# Supplementary material
Source: PubMed Central journal article supplement (PMC6923572)
Supplement: NIHMS1539512-supplement-Supplemental_Digital_Content_2.pdf [file NIHMS1539512-supplement-Supplemental_Digital_Content_2.pdf]

**Appendix 1. Conditions Included in Centers for Disease Control and Prevention Severe Maternal Morbidity Composite**

Acute Myocardial infarction/aneurysm  
Acute renal failure  
Adult respiratory distress syndrome  
Amniotic fluid embolism  
Cardiac arrest/ventricular fibrillation/conversion of cardiac rhythm  
Disseminated intravascular coagulation  
Eclampsia  
Heart failure/arrest during surgery or procedure  
Puerperal cerebrovascular disorders  
Pulmonary edema / acute heart failure  
Severe anesthesia complications  
Sepsis  
Shock  
Sickle cell disease with crisis  
Air and thrombotic embolism  
Blood products transfusion  
Hysterectomy  
Temporary tracheostomy/ventilation

Data from Severe maternal morbidity indicators and corresponding ICD codes during delivery hospitalizations.  
Available at: <https://www.cdc.gov/reproductivehealth/maternalinfanthealth/smm/severe-morbidity-ICD.htm>.  
Retrieved August 15, 2019.

## Appendix 2. Number of Patients Readmitted by Demographic Characteristic

|                                           | All Patients |          |                |          | Patients with diabetes only |          |                |          |
|-------------------------------------------|--------------|----------|----------------|----------|-----------------------------|----------|----------------|----------|
|                                           | Readmitted   |          | No readmission |          | Readmitted                  |          | No readmission |          |
| <b>Diabetes Status</b>                    | <b>N</b>     | <b>%</b> | <b>N</b>       | <b>%</b> | <b>N</b>                    | <b>%</b> | <b>N</b>       | <b>%</b> |
| No Diabetes                               | 221,934      | 89.4%    | 14,342,690     | 92.8%    | n/a                         | n/a      | n/a            | n/a      |
| T1DM                                      | 1,576        | 0.6%     | 33,887         | 0.2%     | n/a                         | n/a      | n/a            | n/a      |
| T2DM                                      | 4,034        | 1.6%     | 99,869         | 0.6%     | n/a                         | n/a      | n/a            | n/a      |
| GDM                                       | 20,163       | 8.1%     | 963,838        | 6.2%     | n/a                         | n/a      | n/a            | n/a      |
| Unspecified Diabetes                      | 534          | 0.2%     | 12,777         | 0.1%     | n/a                         | n/a      | n/a            | n/a      |
| <b>Age Category</b>                       |              |          |                |          |                             |          |                |          |
| 15-19 years old                           | 23,902       | 9.6%     | 1,255,742      | 8.1%     | 910                         | 3.5%     | 27,160         | 2.5%     |
| 20-24 years old                           | 61,002       | 24.6%    | 3,547,462      | 23.0%    | 3,803                       | 14.5%    | 138,279        | 12.5%    |
| 25-29 years old                           | 65,703       | 26.5%    | 4,379,972      | 28.3%    | 6,439                       | 24.5%    | 279,704        | 25.2%    |
| 30-34 years old                           | 56,629       | 22.8%    | 3,956,838      | 25.6%    | 7,644                       | 29.1%    | 355,103        | 32.0%    |
| 35-39 years old                           | 31,155       | 12.6%    | 1,859,507      | 12.0%    | 5,372                       | 20.4%    | 234,521        | 21.1%    |
| 40-54 years old                           | 9,850        | 4.0%     | 453,541        | 2.9%     | 2,139                       | 8.1%     | 75,604         | 6.8%     |
| <b>Payer</b>                              |              |          |                |          |                             |          |                |          |
| Medicare                                  | 3,966        | 1.6%     | 92,419         | 0.6%     | 725                         | 2.8%     | 10,709         | 1.0%     |
| Medicaid                                  | 129,984      | 52.4%    | 6,594,688      | 42.7%    | 13,284                      | 50.5%    | 450,050        | 40.5%    |
| Private Insurance                         | 103,104      | 41.5%    | 7,970,402      | 51.6%    | 11,251                      | 42.8%    | 600,504        | 54.1%    |
| Self-pay                                  | 3,187        | 1.3%     | 245,189        | 1.6%     | 332                         | 1.3%     | 14,618         | 1.3%     |
| No Charge                                 | 143          | 0.1%     | 9,681          | 0.1%     | 7                           | 0.0%     | 618            | 0.1%     |
| Other                                     | 7,043        | 2.8%     | 498,993        | 3.2%     | 650                         | 2.5%     | 31,210         | 2.8%     |
| Missing                                   | 813          | 0.3%     | 41,689         | 0.3%     | 59                          | 0.2%     | 2,662          | 0.2%     |
| <b>Median Income Quartile by ZIP Code</b> |              |          |                |          |                             |          |                |          |
| Income Quartile 1                         | 81,996       | 33.0%    | 4,279,650      | 27.7%    | 8,857                       | 33.7%    | 291,835        | 26.3%    |
| Income Quartile 2                         | 62,279       | 25.1%    | 3,774,375      | 24.4%    | 6,466                       | 24.6%    | 270,077        | 24.3%    |
| Income Quartile 3                         | 57,810       | 23.3%    | 3,819,060      | 24.7%    | 6,051                       | 23.0%    | 281,735        | 25.4%    |

|                                   |         |       |           |       |        |       |         |       |
|-----------------------------------|---------|-------|-----------|-------|--------|-------|---------|-------|
| Income Quartile 4                 | 43,424  | 17.5% | 3,419,725 | 22.1% | 4,585  | 17.4% | 254,622 | 22.9% |
| Missing                           | 2,731   | 1.1%  | 160,252   | 1.0%  | 349    | 1.3%  | 12,102  | 1.1%  |
| <b>Clinical Factors</b>           |         |       |           |       |        |       |         |       |
| Cesarean delivery                 | 119,194 | 48.0% | 5,066,760 | 32.8% | 15,962 | 60.7% | 520,271 | 46.9% |
| Delivery postpartum hemorrhage    | 11,777  | 4.7%  | 442,565   | 2.9%  | 1,083  | 4.1%  | 35,686  | 3.2%  |
| Lupus                             | 1,038   | 0.4%  | 18,273    | 0.1%  | 96     | 0.4%  | 1,505   | 0.1%  |
| Multiples gestation               | 8,532   | 3.4%  | 290,329   | 1.9%  | 1,018  | 3.9%  | 28,289  | 2.6%  |
| Asthma                            | 14,883  | 6.0%  | 566,341   | 3.7%  | 2,066  | 7.9%  | 53,576  | 4.8%  |
| Chronic kidney disease            | 2,132   | 0.9%  | 40,233    | 0.3%  | 511    | 1.9%  | 5,931   | 0.5%  |
| HDP                               | 42,831  | 17.3% | 1,209,023 | 7.8%  | 6,926  | 26.3% | 152,128 | 13.7% |
| Chronic hypertension              | 9,822   | 4.0%  | 255,485   | 1.7%  | 2,676  | 10.2% | 58,993  | 5.3%  |
| Thromboembolism                   | 855     | 0.3%  | 8,841     | 0.1%  | 105    | 0.4%  | 890     | 0.1%  |
| History of thromboembolism        | 1,854   | 0.8%  | 39,478    | 0.3%  | 283    | 1.1%  | 4,270   | 0.4%  |
| <b>Hospital Teaching Status</b>   |         |       |           |       |        |       |         |       |
| Metro non-teaching                | 86,414  | 34.8% | 5,699,312 | 36.9% | 8,229  | 31.3% | 385,761 | 34.7% |
| Metro teaching                    | 136,025 | 54.8% | 8,077,692 | 52.3% | 16,027 | 60.9% | 629,106 | 56.7% |
| Non-metro                         | 25,802  | 10.4% | 1,676,058 | 10.9% | 2,051  | 7.8%  | 95,505  | 8.6%  |
| <b>Hospital Bed Size</b>          |         |       |           |       |        |       |         |       |
| Small                             | 24,576  | 9.9%  | 1,739,551 | 11.3% | 2,478  | 9.4%  | 123,525 | 11.1% |
| Medium                            | 62,443  | 25.2% | 4,065,288 | 26.3% | 6,220  | 23.6% | 280,884 | 25.3% |
| Large                             | 161,221 | 65.0% | 9,648,222 | 62.4% | 17,609 | 66.9% | 705,963 | 63.6% |
| <b>Hospital Safety Net Status</b> |         |       |           |       |        |       |         |       |
| Low burden                        | 34,621  | 14.0% | 2,750,774 | 17.8% | 3,691  | 14.0% | 210,251 | 18.9% |
| Medium burden                     | 131,581 | 53.0% | 8,139,230 | 52.7% | 13,457 | 51.2% | 560,536 | 50.5% |
| High burden                       | 82,039  | 33.1% | 4,563,058 | 29.5% | 9,159  | 34.8% | 339,585 | 30.6% |

---

Hypertensive disease of pregnancy include gestational hypertension and preeclampsia diagnoses.

### Appendix 3. Number of Patients With Individual Adverse Outcomes on Readmission

|                                           | Adverse outcome |            |
|-------------------------------------------|-----------------|------------|
|                                           | Yes (n)         | No (n)     |
| <b>Severe maternal morbidity</b>          |                 |            |
| Type 1 diabetes                           | 257             | 33,612     |
| Type 2 diabetes                           | 659             | 99,717     |
| Gestational diabetes                      | 3,128           | 960,192    |
| Unspecified                               | 85              | 12,582     |
| No diabetes                               | 31,613          | 14,283,536 |
| <b>Wound complications</b>                |                 |            |
| Type 1 diabetes                           | 182             | 35,282     |
| Type 2 diabetes                           | 876             | 103,026    |
| Gestational diabetes                      | 2,645           | 981,356    |
| Unspecified                               | 100             | 13,211     |
| No diabetes                               | 22,636          | 14,541,988 |
| <b>Diabetic complications</b>             |                 |            |
| Type 1 diabetes                           | 379             | 35,084     |
| Type 2 diabetes                           | 149             | 103,753    |
| Gestational diabetes                      | 56              | 983,945    |
| Unspecified                               | 74              | 13,238     |
| No diabetes                               | 39              | 14,564,585 |
| <b>Hypertensive diseases of pregnancy</b> |                 |            |
| Type 1 diabetes                           | 171             | 35,293     |
| Type 2 diabetes                           | 649             | 103,253    |
| Gestational diabetes                      | 3,737           | 980,264    |
| Unspecified                               | 13,217          | 94         |
| No diabetes                               | 33,144          | 14,531,480 |
| <b>Venous thromboembolism</b>             |                 |            |

---

|                      |       |            |
|----------------------|-------|------------|
| Type 1 diabetes      | 17    | 35,399     |
| Type 2 diabetes      | 100   | 103,666    |
| Gestational diabetes | 657   | 982,564    |
| Unspecified          | DS    | 13,271     |
| No diabetes          | 6,486 | 14,549,437 |

---

\*DS = data suppressed given low cell counts in accordance to the HCUP Data User Agreement. For the severe maternal morbidity analysis, patients with these outcomes during the delivery hospitalization were excluded to avoid misclassification. Similarly, for the thromboembolism analysis patients with an acute event during the delivery hospitalization were excluded; history of venous thromboembolism prior to the delivery hospitalization was accounted for in the model. Diabetic complications including diabetes including diabetic ketoacidosis, hyperglycemic hyperosmolar syndrome, and coma.

#### Appendix 4. Adjusted Models for 60-Day Postpartum Readmission for Specific Complications With Limited Risk Factors

|                                  | Adjusted risk ratio (95% CI) |            |
|----------------------------------|------------------------------|------------|
| <b>Severe maternal morbidity</b> |                              |            |
| Type 1 diabetes                  | 2.20                         | 1.87, 2.59 |
| Type 2 diabetes                  | 1.85                         | 1.67, 2.05 |
| Gestational diabetes             | 1.23                         | 1.17, 1.29 |
| Unspecified                      | 2.11                         | 1.60, 2.79 |
| No diabetes                      |                              | Reference  |
| <b>Wound complications</b>       |                              |            |
| Type 1 diabetes                  | 1.43                         | 1.23, 1.65 |
| Type 2 diabetes                  | 2.54                         | 2.37, 2.72 |
| Gestational diabetes             | 1.30                         | 1.24, 1.35 |
| Unspecified                      | 2.63                         | 2.16, 3.20 |
| No diabetes                      |                              | Reference  |
| <b>Diabetic complications</b>    |                              |            |
| No diabetes                      | 0.00                         | 0.00, 0.00 |
| Type 2 diabetes                  | 0.21                         | 0.17, 0.25 |
| Gestational diabetes             | 0.01                         | 0.01, 0.01 |
| Unspecified                      | 0.73                         | 0.57, 0.95 |
| Type 1 diabetes                  |                              | Reference  |
| <b>Venous thromboembolism</b>    |                              |            |
| Type 1 diabetes                  | 0.68                         | 0.42, 1.08 |
| Type 2 diabetes                  | 1.33                         | 1.08, 1.62 |
| Gestational diabetes             | 1.24                         | 1.14, 1.34 |
| Unspecified                      | 1.22                         | 0.67, 2.23 |
| No diabetes                      |                              | Reference  |

In these adjusted analyses the five study models in the table included only diabetes status, maternal age, mode of delivery and hypertensive diseases of pregnancy. Compared to the primary analysis, this restricted set of risk factors was included to prevent model overfitting. Given the relatively large number of readmissions for hypertensive diseases of pregnancy, the model was not repeated for this outcome. For the severe maternal morbidity analysis, patients with these outcomes during the delivery hospitalization were excluded to avoid misclassification. Similarly, for the thromboembolism analysis patients with an acute event during the delivery hospitalization were excluded; history of venous thromboembolism prior to the delivery hospitalization was accounted for in the model. Diabetic complications including diabetes including diabetic ketoacidosis, hyperglycemic hyperosmolar syndrome, and coma.
